# Supplementary material for: The Latest in Resuscitation Research: Highlights From the 2020 American Heart Association's Resuscitation Science Symposium
Source: PubMed Central journal article supplement — J Am Heart Assoc. 2021 Aug 7;10(16):e021575. doi: 10.1161/JAHA.121.021575 (PMC8475047; doi:10.1161/jaha.121.021575), 2021-08-07
Supplement: JAH3-10-e021575-s001.pdf [file JAH3-10-e021575-s001.pdf]

# **Supplemental Material**

**Table S1. ReSS 2020 Young Investigator Awards<sup>1</sup>.**

| Young Investigator Awardee | Research Title                                                                                                                                                                             |
|----------------------------|--------------------------------------------------------------------------------------------------------------------------------------------------------------------------------------------|
| Aaron Braverman            | Asphyxial Cardiac Arrest Induces Dynamic Changes in Dopamine Neurotransmission and Linked Behavioral Deficits                                                                              |
| Cheng Cheng                | Effects of $\omega$ -3 Polyunsaturated Fatty Acids on Systemic Inflammation and Post-resuscitation Myocardial Function in a Rat Model of Cardiac Arrest and Cardiopulmonary Resuscitation  |
| Allison Cohen              | Time for a Change: Use of Doppler Ultrasound for Pulse Checks in Cardiac Arrest Patients                                                                                                   |
| Ryan Coute                 | Annual and Lifetime Economic Productivity Loss Due to Adult Out-of-hospital Cardiac Arrest in the United States                                                                            |
| Nobuyuki Enzan             | Delayed Administration of Epinephrine is Associated with Worse Neurological Outcomes in Patients with Out-of-hospital Cardiac Arrest and Initial Pulseless Electrical Activity             |
| Edward Ford                | Characterizing Impact of State Legislation on Cardiac Arrest Outcomes at K-12 Schools                                                                                                      |
| Teresa Gordon              | Using Defibrillator Bioimpedance Waveforms to Measure Ventilation During Continuous Chest Compression CPR                                                                                  |
| Cindy Hsu                  | Aerosol Generation During Chest Compression and Defibrillation in a Swine Cardiac Arrest Model                                                                                             |
| Ryan Huebinger             | Disparities in Out of Hospital Cardiac Arrest Care and Outcomes in Texas                                                                                                                   |
| Tiffany Ko                 | Non-invasive Measurement of Cerebral Tissue Oxygen Extraction Fraction is Correlated with Microdialysis Brain Injury Biomarkers During Extracorporeal Cardiopulmonary Resuscitation        |
| K.H. Benjamin Leung        | A Machine Learning-based Dispatch Rule for Drone-delivered Defibrillators                                                                                                                  |
| Hui Li                     | Artesunate Reduces the Severity of Post-Resuscitation Myocardial and Cerebral Dysfunction                                                                                                  |
| Lian Liang                 | Combined Therapy with Polyethylene Glycol-20k and MCC950 Preserves Post-resuscitation Myocardial Mitochondrial Function in a Rat Model of Cardiac Arrest and Cardiopulmonary Resuscitation |
| Ali Malik                  | Association of Acute Exposure to Ambient Air Particulate Matter and Ozone with Risk of Out-of-hospital Cardiac Arrest                                                                      |
| Yusuke Miyazaki            | Role of Iron Metabolism on Outcomes after Cardiac Arrest and Resuscitation in Mice                                                                                                         |
| Ryan Morgan                | A Pre-Clinical Randomized Blinded Trial of Inhaled Nitric Oxide During Pediatric Cardiopulmonary Resuscitation                                                                             |
| Mitsuaki Nishikimi         | Identification of Decreased Plasma Lysophosphatidylcholine Using Phospholipidomics in Cardiac Arrest: A Novel Therapeutic Application                                                      |
| Gregory Peters             | Cardiac Arrest Management in Rural Prehospital Care                                                                                                                                        |
| Daniel Rolston             | Mechanical, Team-focused, Video-Reviewed Cardiopulmonary Resuscitation Improves Trends in Survival to Discharge and Cardiac Arrest Performance Measures                                    |
